# Supplementary material for: Prediction of formation probability of rare earth uranates inside nuclear reactor fuel from the determined oxygen potential using a solid oxide galvanic cell
Source: Royal Society of Chemistry journal article supplement (doi:10.1039/d1nj00855b), 2021-01-01
Supplement: d1nj00855b1.pdf [file d1nj00855b1.pdf]

Electronic Supplementary Material (ESI) for New Journal of Chemistry

**Prediction of Formation Probability of Rare earth uranates inside nuclear reactor fuel from the determined oxygen potential using solid oxide Galvanic cell**

**ManjulataSahu<sup>a,c\*</sup>, Sumanta Mukherjee<sup>b,c</sup>, Geeta R. Patkare<sup>b</sup>, Smruti Dash<sup>b,c</sup>, M.K.Saxena<sup>a</sup>**

Table 1

The reversible E.m.fs of Galvanic cell(1) : (-) Pt, {Ni(s) + NiO(s)} //YSZ// air {(p(O<sub>2</sub>) = 20.95 kPa)}, Pt (+)

| <i>T/K</i> | <b>E.m.f/V(Experiment)</b> | <b>E.m.f/V(Fitted)</b> | <b>Δ E.m.f/V</b> |
|------------|----------------------------|------------------------|------------------|
| 867.0      | 0.8430                     | 0.8402                 | -0.0028          |
| 703.3      | 0.9084                     | 0.9117                 | 0.0033           |
| 967.7      | 0.7978                     | 0.7963                 | -0.0015          |
| 1005.0     | 0.7806                     | 0.7800                 | -0.0006          |
| 1041.0     | 0.7651                     | 0.7643                 | -0.0008          |
| 1080.7     | 0.7480                     | 0.7470                 | -0.0010          |
| 1122.7     | 0.7289                     | 0.7287                 | -0.0002          |
| 1042.4     | 0.7659                     | 0.7637                 | -0.0022          |
| 1076.4     | 0.7495                     | 0.7489                 | -0.0006          |
| 1093.5     | 0.7384                     | 0.7414                 | 0.0030           |
| 1124.8     | 0.7258                     | 0.7277                 | 0.0019           |
| 1155.0     | 0.7143                     | 0.7146                 | 0.0003           |
| 1187.0     | 0.6990                     | 0.7006                 | 0.0016           |



|        |        |        |         |        |        |        |         |  |  |  |  |  |  |  |  |
|--------|--------|--------|---------|--------|--------|--------|---------|--|--|--|--|--|--|--|--|
| 1191.1 | 0.1510 | 0.1492 | -0.0018 | 1075.5 | 0.5162 | 0.5170 | 0.0008  |  |  |  |  |  |  |  |  |
| 992.1  | 0.2060 | 0.2002 | -0.0058 | 1040.5 | 0.5353 | 0.5371 | 0.0018  |  |  |  |  |  |  |  |  |
| 1050.5 | 0.1824 | 0.1853 | 0.0029  | 1009.1 | 0.5571 | 0.5552 | -0.0019 |  |  |  |  |  |  |  |  |
| 1080.7 | 0.1742 | 0.1775 | 0.0033  | 1001.1 | 0.5630 | 0.5598 | -0.0032 |  |  |  |  |  |  |  |  |
| 1123.5 | 0.1672 | 0.1665 | -0.0007 | 940.6  | 0.6000 | 0.5946 | -0.0054 |  |  |  |  |  |  |  |  |
| 1154.7 | 0.1600 | 0.1585 | -0.0015 | 907.5  | 0.6181 | 0.6136 | -0.0045 |  |  |  |  |  |  |  |  |
| 1185.6 | 0.1519 | 0.1506 | -0.0013 | 965.7  | 0.5709 | 0.5801 | 0.0092  |  |  |  |  |  |  |  |  |
|        |        |        |         | 1031.3 | 0.5462 | 0.5424 | -0.0038 |  |  |  |  |  |  |  |  |
|        |        |        |         | 1027.8 | 0.5417 | 0.5444 | 0.0027  |  |  |  |  |  |  |  |  |
|        |        |        |         | 1055.6 | 0.5257 | 0.5284 | 0.0027  |  |  |  |  |  |  |  |  |
|        |        |        |         | 1090.1 | 0.5087 | 0.5086 | -0.0001 |  |  |  |  |  |  |  |  |
|        |        |        |         | 1114.2 | 0.5005 | 0.4947 | -0.0058 |  |  |  |  |  |  |  |  |
|        |        |        |         | 1142.7 | 0.4818 | 0.4783 | -0.0035 |  |  |  |  |  |  |  |  |
|        |        |        |         | 1142.2 | 0.4815 | 0.4786 | -0.0029 |  |  |  |  |  |  |  |  |
|        |        |        |         | 1174.3 | 0.4626 | 0.4602 | -0.0024 |  |  |  |  |  |  |  |  |
|        |        |        |         | 1190.3 | 0.4508 | 0.4510 | 0.0002  |  |  |  |  |  |  |  |  |

$\Delta E.m.f / V = E.m.f(\text{Fitted}) - E.m.f(\text{Experimental})$
